# Supplementary material
Source: publisher figshare collection journal article supplement (https://acs.figshare.com/ndownloader/files/9036067)
Supplement: Supplementary file 1 [file 9036067]

## Supporting Information

### **Rh-MnO Interface Sites Formed by Atomic Layer Deposition Promote Syngas Conversion to Higher Oxygenates**

*Nuoya Yang<sup>a</sup>, Jong Suk Yoo<sup>b</sup>, Julia Schumann<sup>b,c</sup>, Pallavi Bothra<sup>b,c</sup>, Joseph A. Singh<sup>d</sup>, Eduardo Valle<sup>b</sup>, Frank Abild-Pedersen<sup>b,c</sup>, Jens K. Nørskov<sup>b,c</sup>, Stacey F. Bent<sup>b\*</sup>*

<sup>a</sup>Department of Materials Science and Engineering, Stanford University, 496 Lomita Mall, Stanford, California, 94305, United States

<sup>b</sup>Department of Chemical Engineering, Stanford University, 443 Via Ortega, Stanford, California, 94305, United States

<sup>c</sup>SLAC National Accelerator Laboratory, SUNCAT Center for Interface Science and Catalysis, 2575 Sand Hill Road, Menlo Park, California, 94025, United States

<sup>d</sup>Department of Chemistry, Stanford University, 333 Campus Drive, Stanford, CA 94305, United States

\* Corresponding Author: sbent@stanford.edu

1. Syngas conversion activity and selectivity of Rh/MnO/SiO<sub>2</sub> catalysts with different Rh loading.

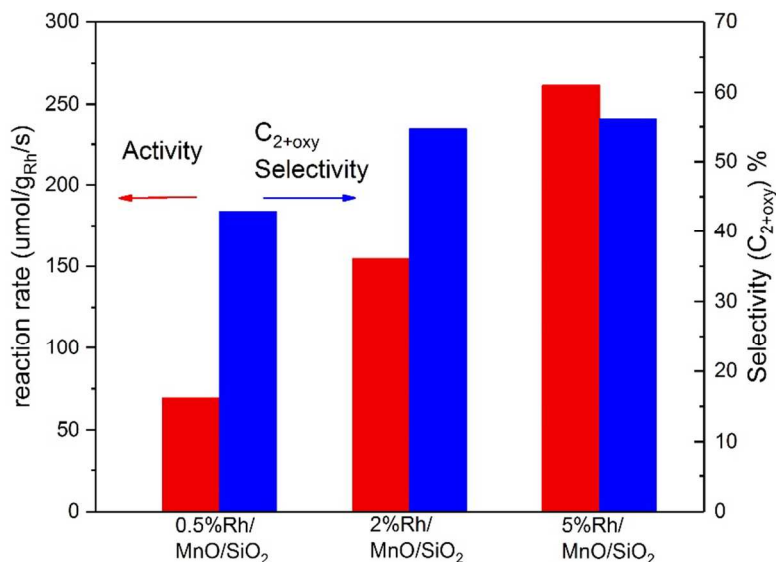

Figure S1. Activity (red) and C<sub>2+oxy</sub> selectivity (blue) of 0.5wt%Rh/MnO/SiO<sub>2</sub>, 2wt%Rh/MnO/SiO<sub>2</sub>, and 5wt%Rh/MnO/SiO<sub>2</sub>.

Table S1. CO chemisorption and dispersion of Rh/SiO<sub>2</sub> with 1% and 5% Rh loading

| Sample                | CO chemisorption<br>(μmol/g <sub>cat</sub> ) | Dispersion (%) |
|-----------------------|----------------------------------------------|----------------|
| 1%Rh/SiO <sub>2</sub> | 44.3                                         | 45.6           |
| 5%Rh/SiO <sub>2</sub> | 178.6                                        | 36.8           |

The dispersion of 1%Rh/SiO<sub>2</sub> is higher than that of 5%Rh/SiO<sub>2</sub>, as expected, indicating smaller Rh nanoparticle size on 1%Rh/SiO<sub>2</sub>. However, the total amount of Rh surface atoms on 1%Rh/SiO<sub>2</sub> is only 25% of that on 5%Rh/SiO<sub>2</sub>, based on the CO chemisorption values. Therefore, even with the lower dispersion, 5%Rh/SiO<sub>2</sub> still has a larger total Rh surface area, suggesting a higher contact area with the support. Since the size distribution of Rh nanoparticles remains similar on both the SiO<sub>2</sub> or MnO/SiO<sub>2</sub> supports, we conclude that the contact area between Rh and the MnO/SiO<sub>2</sub> support increases with higher Rh loading.

## 2. Additional data from DFT calculation

### 2.1 Structural illustration of MnO promoted Rh surface models used in DFT calculation

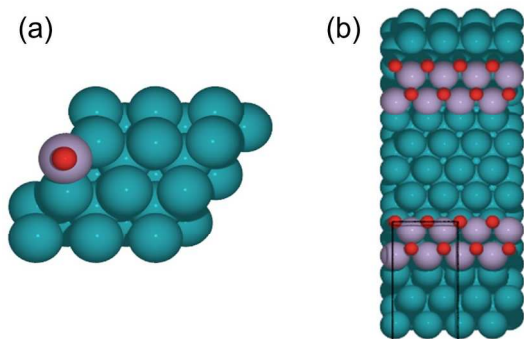

Figure S2. Surface model of MnO promoted Rh (111) (Rh: green, Mn: purple, O: red) (a) Rh/MnO (monomer) ; (b) Rh/MnO (stripe)

### 2.2 Free energy diagram of syngas conversion towards methane, acetaldehyde and ethanol on unpromoted and MnO promoted Rh (111) surface

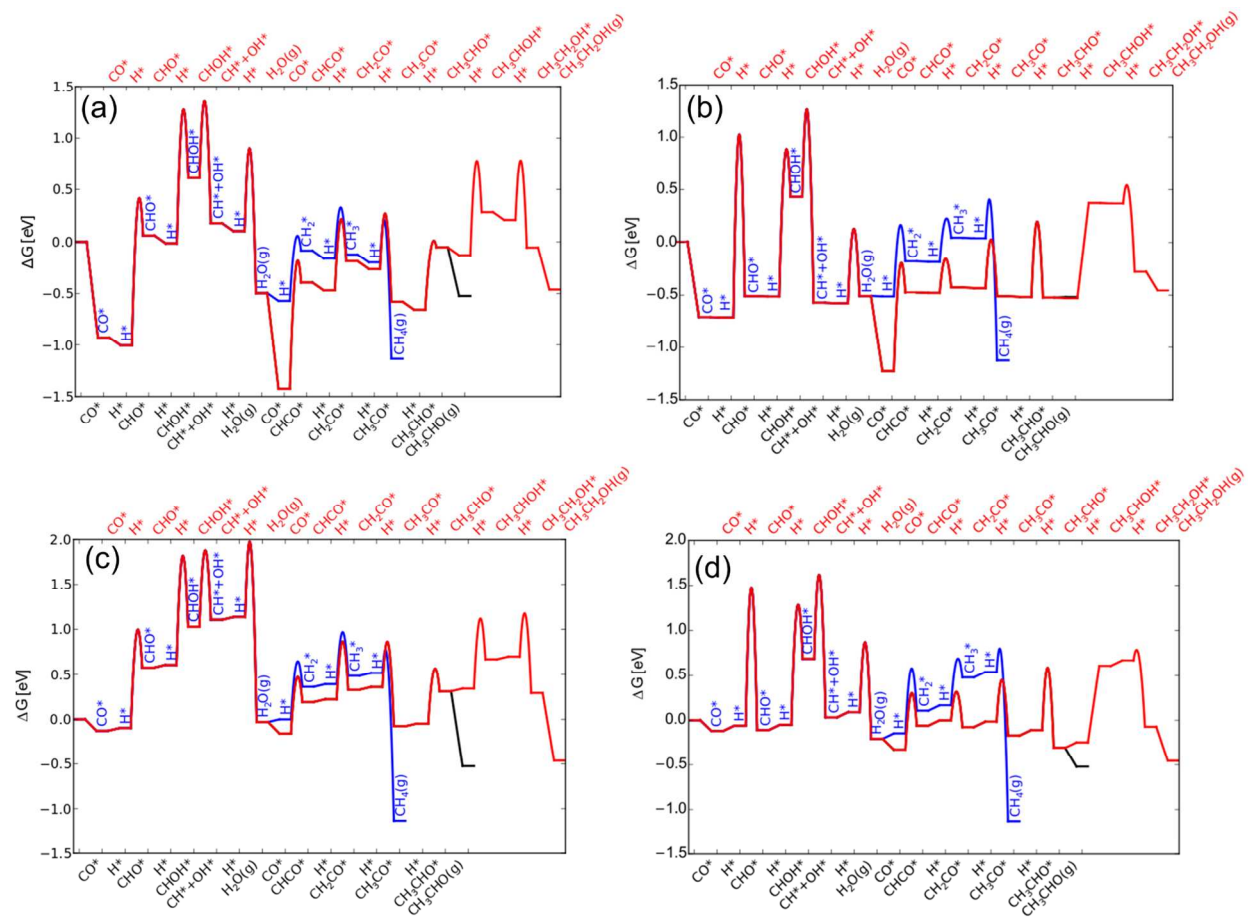

Figure S3. Free energy diagrams at 525 K on (a) Rh (111) and (b) Rh/MnO (monomer) without lateral adsorbate interaction and (c) Rh (111) and (d) Rh/MnO (monomer) with lateral adsorbate

interactions at steady state coverage. Red, blue and black color designate ethanol, methane and acetaldehyde formation pathways respectively. Reaction conditions are:  $P_{H_2}$  = 13.33,  $P_{CO}$  = 6.66. All other free energies are calculated at standard states (1 bar pressure). (a) and (c) are adapted with permission from Yang, N.; Medford, A. J.; Liu, X.; Studt, F.; Bligaard, T.; Bent, S. F.; Nørskov, J. K. J. Am. Chem. Soc. 2016, 138 (11), 3705–3714. Copyright (2016) American Chemical Society.

### 3. Comparison between ALD and incipient wetness impregnation deposited MnO/Rh/SiO<sub>2</sub>

Besides using ALD to deposit MnO film, we also synthesized MnO<sub>2</sub>/Rh/SiO<sub>2</sub> by depositing MnO<sub>2</sub> on calcined Rh/SiO<sub>2</sub> using incipient wetness impregnation followed by calcination in air. This catalyst is designated as IMP-MnO<sub>2</sub>/Rh/SiO<sub>2</sub>. (MnO<sub>2</sub> should be reduced to MnO during the reduction step prior to syngas conversion.) The MnO<sub>2</sub> deposited by this impregnation method most likely exists as particles. The table below compares MnO/Rh/SiO<sub>2</sub> (i.e. Rh particles with MnO film) and IMP-MnO<sub>2</sub>/Rh/SiO<sub>2</sub> (i.e. Rh particles with MnO particle). These two samples show similar activity, but ALD-MnO/ Rh/SiO<sub>2</sub> is more selective to C<sub>2</sub>+oxy. It is difficult to quantify how much Mn is interacting with Rh in either case, but higher C<sub>2</sub>+oxy selectivity from the sample could suggest that a more evenly distributed MnO film leads to better contact with Rh and therefore improves selectivity more than MnO particles.

Table S2. Syngas conversion activity and selectivity of ALD deposited MnO/Rh/SiO<sub>2</sub> and MnO<sub>2</sub>/Rh/SiO<sub>2</sub> prepared by incipient wetness impregnation.

|                                                | CO<br>conversion<br>rate<br>( $\mu\text{mol/gcat/s}$ ) | S(CH <sub>4</sub> ) % | S(C <sub>2</sub> +HC)<br>% | S(AcH)% | S(EtOH)% | S(total<br>C <sub>2</sub> +oxy)<br>% |
|------------------------------------------------|--------------------------------------------------------|-----------------------|----------------------------|---------|----------|--------------------------------------|
| <b>MnO/Rh/SiO<sub>2</sub></b>                  | 9.1                                                    | 30                    | 28.7                       | 35      | 4.2      | 40.5                                 |
| <b>IMP-MnO<sub>2</sub>/Rh/SiO<sub>2</sub>*</b> | 7.9                                                    | 41                    | 33                         | 17.8    | 6.2      | 24                                   |

\*Mn/Rh atomic ratio = 1:5 in the impregnation sample.
